# Supplementary material for: Los medios y su consumo en los jóvenes
Source: Royal Society of Chemistry journal article supplement (doi:10.1039/c8ra05274c), 2004-01-01

# Supplementary materials

for

## Theoretical Investigations of Azole-Fused Tricyclic 1,2,3,4-Tetrazine-2-Oxides

Teng Fei, Yao Du, Chunlin He\* and Siping Pang\*

School of Materials Science & Engineering, Beijing Institute of Technology,  
Beijing 100081, P. R. China. E-mail: chunlinhe@bit.edu.cn, pangsp@bit.edu.cn

### Summary of surface analysis of compound A-E.

#### Compound A:

Volume: 2074.27920 Bohr<sup>3</sup> (307.37653 Angstrom<sup>3</sup>)

Minimal value: -18.32295 kcal/mol

Maximal value: 69.00284 kcal/mol

Overall surface area: 1026.33773 Bohr<sup>2</sup> (287.40388 Angstrom<sup>2</sup>)

Positive surface area: 535.51620 Bohr<sup>2</sup> (149.95983 Angstrom<sup>2</sup>)

Negative surface area: 490.82153 Bohr<sup>2</sup> (137.44405 Angstrom<sup>2</sup>)

Overall average value: 0.01230849 a.u. (7.72370 kcal/mol)

Positive average value: 0.03565103 a.u. (22.37138 kcal/mol)

Negative average value: -0.01315964 a.u. (-8.25781 kcal/mol)

Overall variance ( $\sigma^2_{tot}$ ): 0.00076323 a.u.<sup>2</sup> (300.53728 (kcal/mol)<sup>2</sup>)

Positive variance: 0.00070810 a.u.<sup>2</sup> (278.82900 (kcal/mol)<sup>2</sup>)

Negative variance: 0.00005513 a.u.<sup>2</sup> (21.70828 (kcal/mol)<sup>2</sup>)

Balance of charges ( $\mu$ ): 0.06701416

Product of  $\sigma^2_{tot}$  and  $\mu$ : 0.00005115 a.u.<sup>2</sup> (20.14025 (kcal/mol)<sup>2</sup>)

Internal charge separation ( $\Pi$ ): 0.02618855 a.u. (16.43358 kcal/mol)

#### Compound B:

Volume: 2065.54638 Bohr<sup>3</sup> (306.08246 Angstrom<sup>3</sup>)

Minimal value: -19.74669 kcal/mol Maximal value: 69.58498 kcal/mol

Overall surface area: 1027.33707 Bohr<sup>2</sup> (287.68372 Angstrom<sup>2</sup>)

Positive surface area: 551.61405 Bohr<sup>2</sup> (154.46769 Angstrom<sup>2</sup>)

Negative surface area: 475.72302 Bohr<sup>2</sup> (133.21603 Angstrom<sup>2</sup>)

Overall average value: 0.01320515 a.u. (8.28636 kcal/mol)

Positive average value: 0.03677906 a.u. (23.07923 kcal/mol)

Negative average value: -0.01412946 a.u. (-8.86638 kcal/mol)

Overall variance ( $\sigma^2_{tot}$ ): 0.00080487 a.u.<sup>2</sup> (316.93132 (kcal/mol)<sup>2</sup>)

Positive variance: 0.00074248 a.u.<sup>2</sup> (292.36512 (kcal/mol)<sup>2</sup>)

Negative variance: 0.00006239 a.u.<sup>2</sup> (24.56620 (kcal/mol)<sup>2</sup>)  
Balance of charges (miu): 0.07150447  
Product of sigma<sup>2</sup>\_tot and miu: 0.00005755 a.u.<sup>2</sup> (22.66201 (kcal/mol)<sup>2</sup>)  
Internal charge separation (Pi): 0.02739873 a.u. (17.19298 kcal/mol)

#### **Compound C:**

Volume: 1590.16489 Bohr<sup>3</sup> (235.63818 Angstrom<sup>3</sup>)  
Minimal value: -20.91166 kcal/mol  
Maximal value: 67.72457 kcal/mol  
Overall surface area: 808.72951 Bohr<sup>2</sup> (226.46736 Angstrom<sup>2</sup>)  
Positive surface area: 423.71820 Bohr<sup>2</sup> (118.65320 Angstrom<sup>2</sup>)  
Negative surface area: 385.01130 Bohr<sup>2</sup> (107.81416 Angstrom<sup>2</sup>)  
Overall average value: 0.01123245 a.u. (7.04848 kcal/mol)  
Positive average value: 0.03539105 a.u. (22.20824 kcal/mol)  
Negative average value: -0.01535491 a.u. (-9.63536 kcal/mol)  
Overall variance (sigma<sup>2</sup>\_tot): 0.00077652 a.u.<sup>2</sup> (305.77027 (kcal/mol)<sup>2</sup>)  
Positive variance: 0.00069260 a.u.<sup>2</sup> (272.72554 (kcal/mol)<sup>2</sup>)  
Negative variance: 0.00008392 a.u.<sup>2</sup> (33.04473 (kcal/mol)<sup>2</sup>)  
Balance of charges (miu): 0.09639122  
Product of sigma<sup>2</sup>\_tot and miu: 0.00007485 a.u.<sup>2</sup> (29.47357 (kcal/mol)<sup>2</sup>)  
Internal charge separation (Pi): 0.02685908 a.u. (16.85434 kcal/mol)

#### **Compound D:**

Volume: 1594.14943 Bohr<sup>3</sup> (236.22862 Angstrom<sup>3</sup>)  
Minimal value: -21.14315 kcal/mol  
Maximal value: 67.49726 kcal/mol  
Overall surface area: 844.72468 Bohr<sup>2</sup> (236.54704 Angstrom<sup>2</sup>)  
Positive surface area: 437.63743 Bohr<sup>2</sup> (122.55098 Angstrom<sup>2</sup>)  
Negative surface area: 407.08726 Bohr<sup>2</sup> (113.99606 Angstrom<sup>2</sup>)  
Overall average value: 0.01167800 a.u. (7.32806 kcal/mol)  
Positive average value: 0.03829762 a.u. (24.03214 kcal/mol)  
Negative average value: -0.01693931 a.u. (-10.62958 kcal/mol)  
Overall variance (sigma<sup>2</sup>\_tot): 0.00078211 a.u.<sup>2</sup> (307.97013 (kcal/mol)<sup>2</sup>)  
Positive variance: 0.00070480 a.u.<sup>2</sup> (277.52780 (kcal/mol)<sup>2</sup>)  
Negative variance: 0.00007731 a.u.<sup>2</sup> (30.44233 (kcal/mol)<sup>2</sup>)  
Balance of charges (miu): 0.08907732  
Product of sigma<sup>2</sup>\_tot and miu: 0.00006967 a.u.<sup>2</sup> (27.43315 (kcal/mol)<sup>2</sup>)  
Internal charge separation (Pi): 0.02893838 a.u. (18.15913 kcal/mol)

#### **Compound E:**

Volume: 1109.23492 Bohr<sup>3</sup> (164.37169 Angstrom<sup>3</sup>)  
Minimal value: -21.79792 kcal/mol  
Maximal value: 63.85011 kcal/mol  
Overall surface area: 602.94419 Bohr<sup>2</sup> (168.84159 Angstrom<sup>2</sup>)

Positive surface area: 308.54255 Bohr<sup>2</sup> (86.40073 Angstrom<sup>2</sup>)  
 Negative surface area: 294.40165 Bohr<sup>2</sup> (82.44087 Angstrom<sup>2</sup>)  
 Overall average value: 0.01075678 a.u. (6.74999 kcal/mol)  
 Positive average value: 0.03441315 a.u. (21.59460 kcal/mol)  
 Negative average value: -0.01403587 a.u. (-8.80765 kcal/mol)  
 Overall variance ( $\sigma^2_{tot}$ ): 0.00076060 a.u.<sup>2</sup> (299.49903 (kcal/mol)<sup>2</sup>)  
 Positive variance: 0.00068736 a.u.<sup>2</sup> (270.66029 (kcal/mol)<sup>2</sup>)  
 Negative variance: 0.00007324 a.u.<sup>2</sup> (28.83873 (kcal/mol)<sup>2</sup>)  
 Balance of charges ( $\mu$ ): 0.08701816  
 Product of  $\sigma^2_{tot}$  and  $\mu$ : 0.00006619 a.u.<sup>2</sup> (26.06186 (kcal/mol)<sup>2</sup>)  
 Internal charge separation ( $\Pi$ ): 0.02566361 a.u. (16.10417 kcal/mol)

## Summary of natural population analysis of A-E.

**Table S1** Summary of Natural Population Analysis of Compound A.

| Atom    | No. | Natural Charge | Natural Population |           |         |           |
|---------|-----|----------------|--------------------|-----------|---------|-----------|
|         |     |                | Core               | Valence   | Rydberg | Total     |
| C       | 1   | 0.03844        | 1.99853            | 3.93489   | 0.02815 | 5.96156   |
| C       | 2   | 0.29824        | 1.99878            | 3.66858   | 0.0344  | 5.70176   |
| N       | 3   | -0.20285       | 1.99932            | 5.16593   | 0.0376  | 7.20285   |
| N       | 4   | -0.00205       | 1.9992             | 4.97725   | 0.0256  | 7.00205   |
| C       | 5   | 0.14488        | 1.99883            | 3.83279   | 0.02349 | 5.85512   |
| C       | 6   | 0.15709        | 1.99894            | 3.82214   | 0.02183 | 5.84291   |
| N       | 7   | -0.04202       | 1.99913            | 5.01054   | 0.03234 | 7.04202   |
| N       | 8   | -0.19494       | 1.99929            | 5.15895   | 0.03669 | 7.19494   |
| C       | 9   | 0.30618        | 1.99878            | 3.66193   | 0.03311 | 5.69382   |
| C       | 10  | 0.04704        | 1.9985             | 3.92642   | 0.02803 | 5.95296   |
| N       | 11  | -0.03583       | 1.99942            | 4.99864   | 0.03777 | 7.03583   |
| N       | 12  | 0.44867        | 1.99942            | 4.50966   | 0.04224 | 6.55133   |
| O       | 13  | -0.30751       | 1.99979            | 6.28487   | 0.02285 | 8.30751   |
| N       | 14  | 0.48666        | 1.99943            | 4.45845   | 0.05547 | 6.51334   |
| O       | 15  | -0.33272       | 1.9998             | 6.31108   | 0.02184 | 8.33272   |
| O       | 16  | -0.30991       | 1.99979            | 6.28848   | 0.02164 | 8.30991   |
| N       | 17  | 0.50622        | 1.9994             | 4.4417    | 0.05267 | 6.49378   |
| O       | 18  | -0.35162       | 1.9998             | 6.32807   | 0.02376 | 8.35162   |
| O       | 19  | -0.31271       | 1.99979            | 6.29192   | 0.02099 | 8.31271   |
| N       | 20  | 0.50409        | 1.9994             | 4.44427   | 0.05224 | 6.49591   |
| O       | 21  | -0.31787       | 1.99979            | 6.29714   | 0.02094 | 8.31787   |
| O       | 22  | -0.36784       | 1.9998             | 6.34387   | 0.02417 | 8.36784   |
| N       | 23  | 0.48726        | 1.99943            | 4.45764   | 0.05568 | 6.51274   |
| O       | 24  | -0.31447       | 1.99979            | 6.29293   | 0.02176 | 8.31447   |
| O       | 25  | -0.33242       | 1.9998             | 6.31079   | 0.02183 | 8.33242   |
| *Total* | --  | 0              | 49.98395           | 127.21894 | 0.79710 | 178.00000 |

**Table S2** Summary of Natural Population Analysis of Compound B.

| Atom    | No. | Natural Charge | Natural Population |           |         |           |
|---------|-----|----------------|--------------------|-----------|---------|-----------|
|         |     |                | Core               | Valence   | Rydberg | Total     |
| C       | 1   | 0.28245        | 1.99871            | 3.68756   | 0.03128 | 5.71755   |
| N       | 2   | -0.38239       | 1.99925            | 5.34418   | 0.03896 | 7.38239   |
| C       | 3   | 0.50248        | 1.99898            | 3.46477   | 0.03377 | 5.49752   |
| N       | 4   | -0.20611       | 1.9991             | 5.18556   | 0.02145 | 7.20611   |
| C       | 5   | 0.11291        | 1.99895            | 3.86682   | 0.02133 | 5.88709   |
| C       | 6   | 0.14506        | 1.99879            | 3.83179   | 0.02436 | 5.85494   |
| N       | 7   | -0.25574       | 1.99905            | 5.22747   | 0.02921 | 7.25574   |
| C       | 8   | 0.51418        | 1.99893            | 3.45169   | 0.03519 | 5.48582   |
| N       | 9   | -0.37411       | 1.99924            | 5.33702   | 0.03785 | 7.37411   |
| C       | 10  | 0.27497        | 1.99869            | 3.69572   | 0.03063 | 5.72503   |
| N       | 11  | -0.02563       | 1.99941            | 4.98983   | 0.03638 | 7.02563   |
| N       | 12  | 0.45913        | 1.99942            | 4.49982   | 0.04163 | 6.54087   |
| O       | 13  | -0.32551       | 1.99979            | 6.30225   | 0.02347 | 8.32551   |
| N       | 14  | 0.48966        | 1.99941            | 4.45812   | 0.05281 | 6.51034   |
| O       | 15  | -0.36947       | 1.9998             | 6.34607   | 0.0236  | 8.36947   |
| O       | 16  | -0.31006       | 1.99979            | 6.28957   | 0.0207  | 8.31006   |
| N       | 17  | 0.48938        | 1.99941            | 4.45828   | 0.05292 | 6.51062   |
| O       | 18  | -0.30994       | 1.99979            | 6.28927   | 0.02088 | 8.30994   |
| O       | 19  | -0.37635       | 1.9998             | 6.35287   | 0.02368 | 8.37635   |
| N       | 20  | 0.47744        | 1.99943            | 4.46742   | 0.05572 | 6.52256   |
| O       | 21  | -0.32654       | 1.9998             | 6.30488   | 0.02187 | 8.32654   |
| O       | 22  | -0.30204       | 1.99979            | 6.28025   | 0.02201 | 8.30204   |
| N       | 23  | 0.47074        | 1.99943            | 4.47457   | 0.05526 | 6.52926   |
| O       | 24  | -0.34369       | 1.9998             | 6.32176   | 0.02212 | 8.34369   |
| O       | 25  | -0.31082       | 1.99979            | 6.28859   | 0.02244 | 8.31082   |
| *Total* | --  | 0              | 49.98436           | 127.21613 | 0.79951 | 178.00000 |

**Table S3** Summary of Natural Population Analysis of Compound C.

| Atom | No. | Natural Charge | Natural Population |         |         |         |
|------|-----|----------------|--------------------|---------|---------|---------|
|      |     |                | Core               | Valence | Rydberg | Total   |
| C    | 1   | 0.24662        | 1.99874            | 3.72358 | 0.03106 | 5.75338 |
| N    | 2   | -0.18982       | 1.9994             | 5.14684 | 0.04358 | 7.18982 |
| N    | 3   | -0.00817       | 1.99955            | 4.96773 | 0.04089 | 7.00817 |
| N    | 4   | -0.02386       | 1.9992             | 5       | 0.02466 | 7.02386 |
| C    | 5   | 0.09983        | 1.99894            | 3.88048 | 0.02075 | 5.90017 |
| C    | 6   | 0.14005        | 1.99879            | 3.8365  | 0.02466 | 5.85995 |
| N    | 7   | -0.06589       | 1.99914            | 5.03393 | 0.03283 | 7.06589 |
| N    | 8   | 0.00147        | 1.99953            | 4.95957 | 0.03942 | 6.99853 |
| N    | 9   | -0.17363       | 1.99941            | 5.1329  | 0.04131 | 7.17363 |
| C    | 10  | 0.2432         | 1.99874            | 3.72744 | 0.03063 | 5.7568  |

|         |    |          |          |          |         |           |
|---------|----|----------|----------|----------|---------|-----------|
| N       | 11 | -0.03352 | 1.99941  | 4.99636  | 0.03775 | 7.03352   |
| N       | 12 | 0.45146  | 1.99942  | 4.5073   | 0.04182 | 6.54854   |
| O       | 13 | -0.30624 | 1.99979  | 6.28343  | 0.02302 | 8.30624   |
| N       | 14 | 0.48942  | 1.99942  | 4.45847  | 0.05269 | 6.51058   |
| O       | 15 | -0.35975 | 1.9998   | 6.33651  | 0.02344 | 8.35975   |
| O       | 16 | -0.31203 | 1.99979  | 6.29147  | 0.02077 | 8.31203   |
| N       | 17 | 0.48809  | 1.99942  | 4.45981  | 0.05268 | 6.51191   |
| O       | 18 | -0.37328 | 1.9998   | 6.34979  | 0.02369 | 8.37328   |
| O       | 19 | -0.31393 | 1.99979  | 6.29319  | 0.02095 | 8.31393   |
| *Total* | -- | 0        | 37.98811 | 95.38529 | 0.62660 | 133.99999 |

**Table S4** Summary of Natural Population Analysis of Compound D.

| Atom    | No. | Natural Charge | Natural Population |          |         |           |
|---------|-----|----------------|--------------------|----------|---------|-----------|
|         |     |                | Core               | Valence  | Rydberg | Total     |
| N       | 1   | -0.40933       | 1.9993             | 5.37248  | 0.03755 | 7.40933   |
| C       | 2   | 0.45835        | 1.99908            | 3.50529  | 0.03729 | 5.54165   |
| N       | 3   | -0.21354       | 1.99934            | 5.17603  | 0.03818 | 7.21354   |
| N       | 4   | -0.02407       | 1.99921            | 4.99853  | 0.02633 | 7.02407   |
| C       | 5   | 0.31421        | 1.9991             | 3.66076  | 0.02593 | 5.68579   |
| C       | 6   | 0.36744        | 1.99884            | 3.60181  | 0.03192 | 5.63256   |
| N       | 7   | -0.06832       | 1.99915            | 5.03463  | 0.03454 | 7.06832   |
| N       | 8   | -0.2087        | 1.9993             | 5.17199  | 0.0374  | 7.2087    |
| C       | 9   | 0.47063        | 1.99907            | 3.49442  | 0.03589 | 5.52937   |
| N       | 10  | -0.41328       | 1.9993             | 5.3746   | 0.03937 | 7.41328   |
| N       | 11  | -0.04001       | 1.99942            | 5.00282  | 0.03777 | 7.04001   |
| N       | 12  | 0.44692        | 1.99943            | 4.51154  | 0.04211 | 6.55308   |
| O       | 13  | -0.31165       | 1.99979            | 6.28895  | 0.02291 | 8.31165   |
| N       | 14  | 0.47294        | 1.99944            | 4.47254  | 0.05508 | 6.52706   |
| O       | 15  | -0.3218        | 1.99979            | 6.29977  | 0.02223 | 8.3218    |
| O       | 16  | -0.32883       | 1.9998             | 6.30708  | 0.02196 | 8.32883   |
| N       | 17  | 0.47248        | 1.99944            | 4.47309  | 0.05499 | 6.52752   |
| O       | 18  | -0.33522       | 1.9998             | 6.31329  | 0.02214 | 8.33522   |
| O       | 19  | -0.3282        | 1.99979            | 6.30611  | 0.02229 | 8.3282    |
| *Total* | --  | 0              | 37.98839           | 95.36573 | 0.64588 | 134.00000 |

**Table S5** Summary of Natural Population Analysis of Compound E.

| Atom | No. | Natural Charge | Natural Population |         |         |         |
|------|-----|----------------|--------------------|---------|---------|---------|
|      |     |                | Core               | Valence | Rydberg | Total   |
| N    | 1   | -0.24324       | 1.99938            | 5.20338 | 0.04048 | 7.24324 |
| N    | 2   | -0.02998       | 1.99963            | 4.98181 | 0.04853 | 7.02998 |
| N    | 3   | -0.02525       | 1.99954            | 4.98368 | 0.04204 | 7.02525 |
| N    | 4   | -0.05047       | 1.99918            | 5.02526 | 0.02603 | 7.05047 |

|         |    |          |          |          |         |          |
|---------|----|----------|----------|----------|---------|----------|
| C       | 5  | 0.28917  | 1.99909  | 3.68405  | 0.02769 | 5.71083  |
| C       | 6  | 0.32211  | 1.9991   | 3.64947  | 0.02932 | 5.67789  |
| N       | 7  | -0.08171 | 1.99912  | 5.05788  | 0.02471 | 7.08171  |
| N       | 8  | -0.01435 | 1.99952  | 4.97207  | 0.04276 | 7.01435  |
| N       | 9  | -0.01277 | 1.99963  | 4.96538  | 0.04776 | 7.01277  |
| N       | 10 | -0.24403 | 1.99937  | 5.20457  | 0.04009 | 7.24403  |
| N       | 11 | -0.03935 | 1.99942  | 5.00165  | 0.03828 | 7.03935  |
| N       | 12 | 0.44751  | 1.99943  | 4.50979  | 0.04327 | 6.55249  |
| O       | 13 | -0.31763 | 1.99979  | 6.29425  | 0.02359 | 8.31763  |
| *Total* | -- | 0        | 25.99222 | 63.53323 | 0.47455 | 90.00000 |

The surface areas in each ESP range.

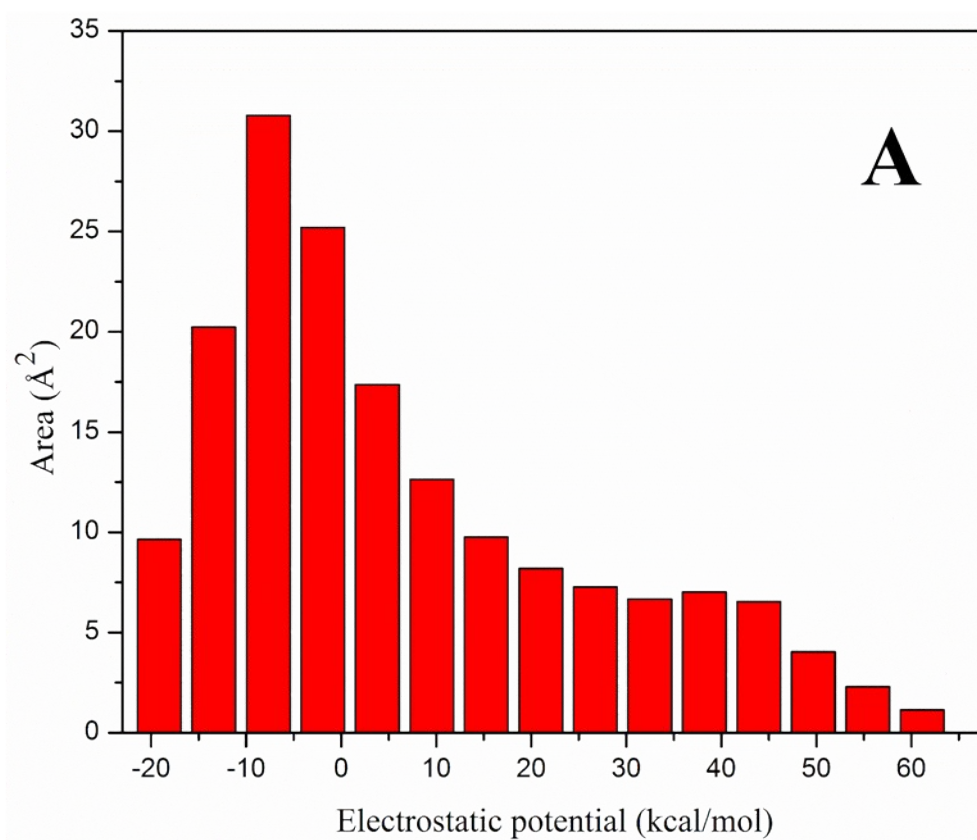

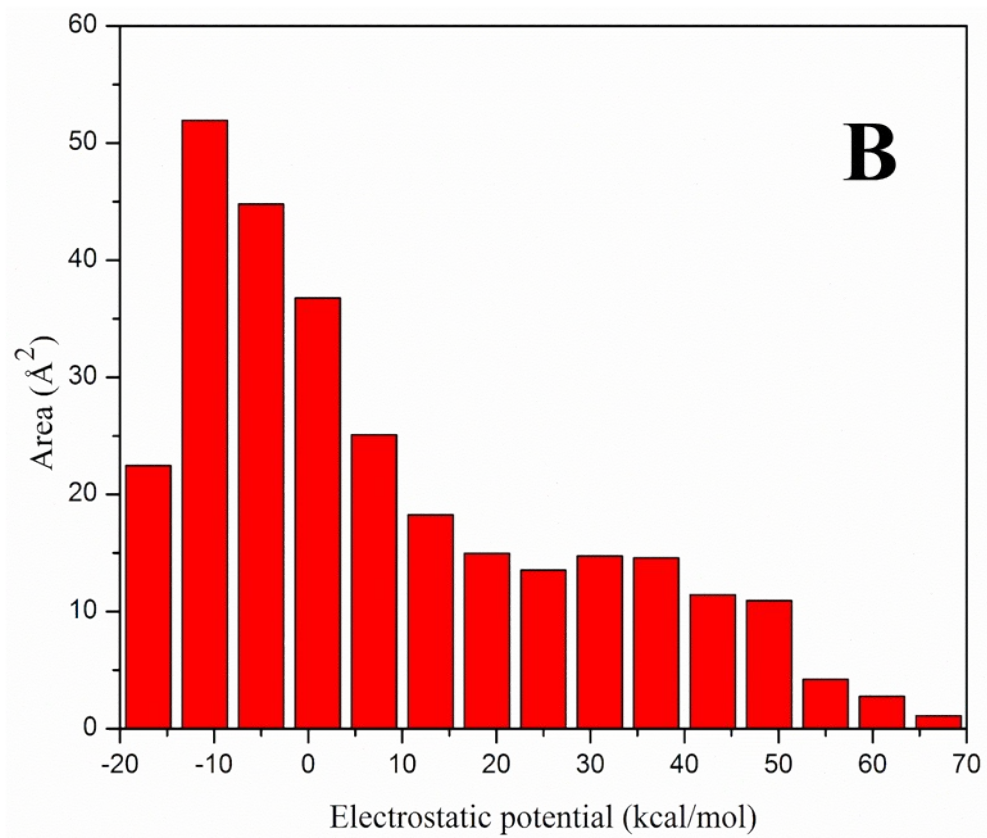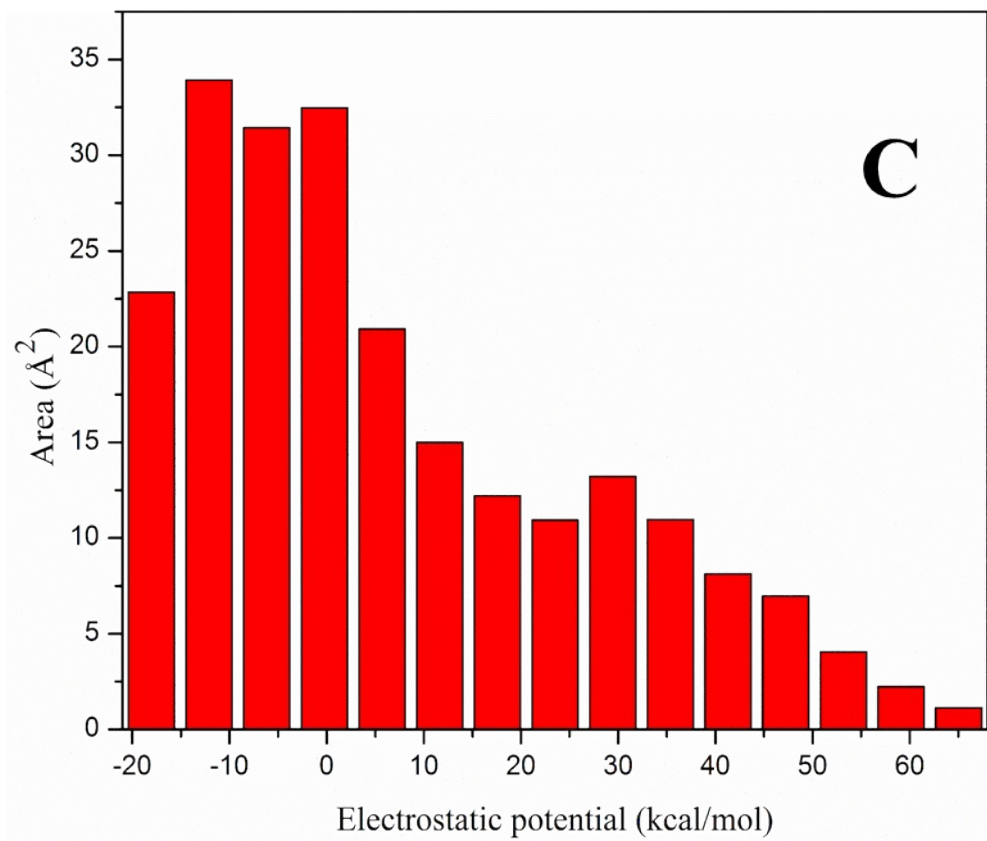

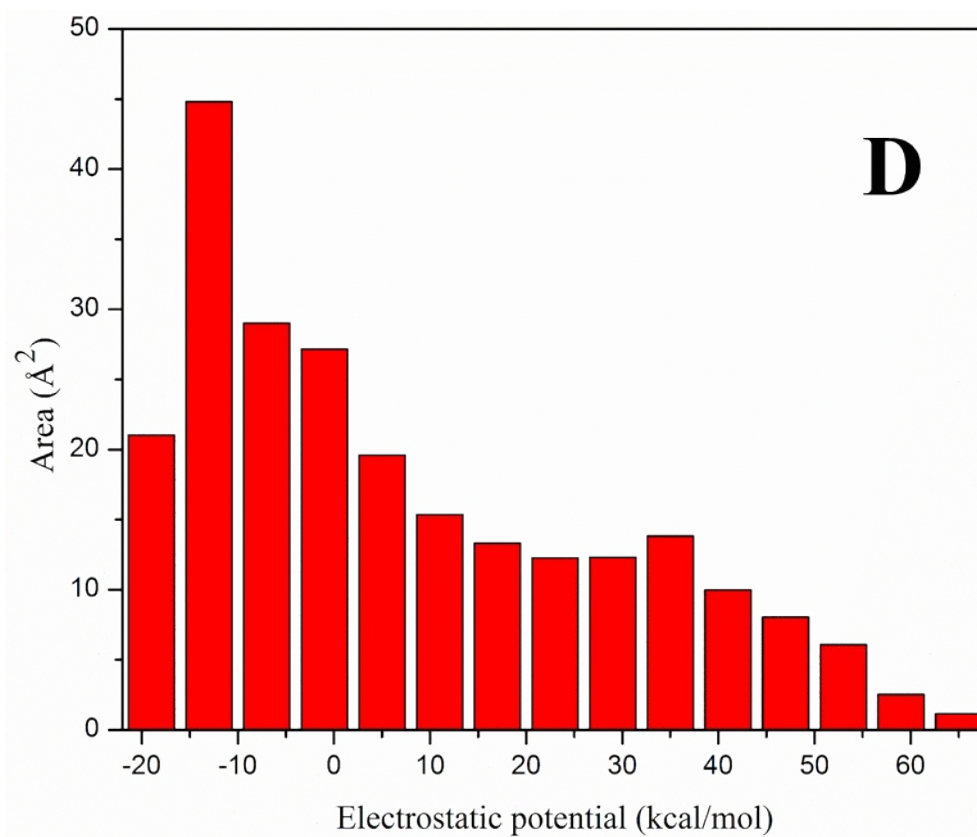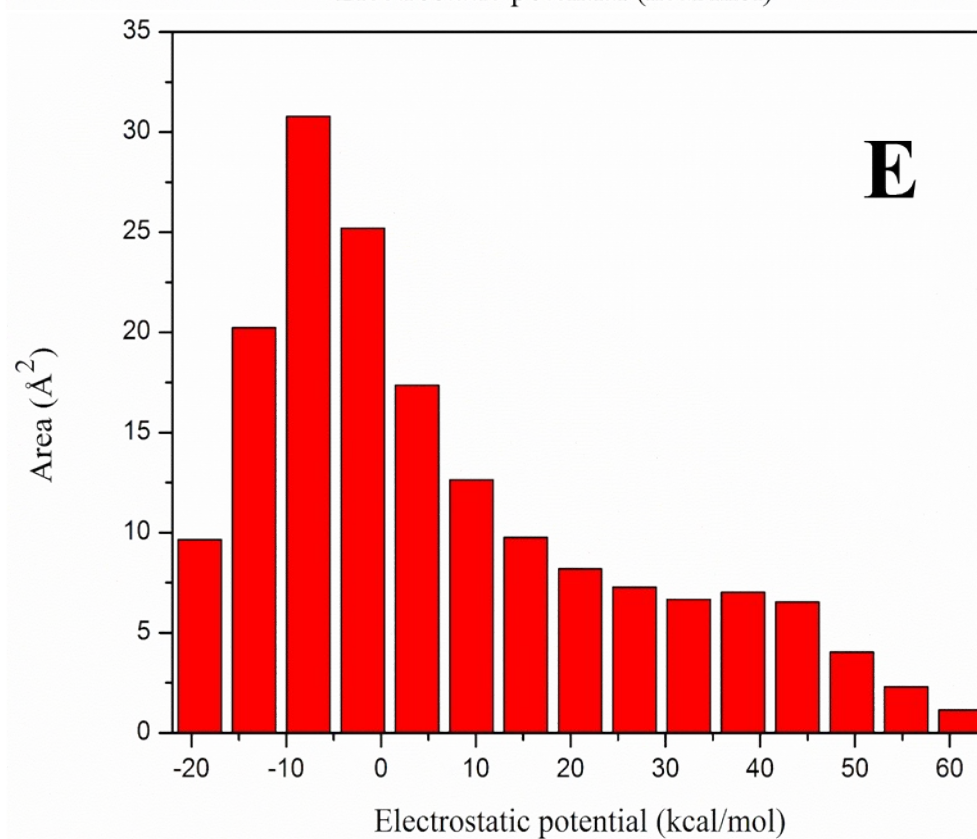

Supplement: c8ra05274c1.pdf [file c8ra05274c1.pdf]
